# Supplementary material for: Association of variants m.T16172C and m.T16519C in whole mtDNA sequences with high altitude pulmonary edema in Han Chinese lowlanders
Source: BMC Pulm Med. 2022 Feb 25;22:72. doi: 10.1186/s12890-021-01791-1 (PMC8881820; doi:10.1186/s12890-021-01791-1)
Supplement: Supplementary file 1 — Additional file 1: Basic clinical information of all the patients. [file 12890_2021_1791_MOESM1_ESM.xlsx]

## Sheet: HAPE(49)
Basic clinical information of HAPE patients.
Patient ID	Gender	Age	Race	Medical History	ascent mode	Smoking	Drinking	Altitude (m)	SBP(mmHg) （<=140）	DBP(mmHg) (<=90)	HR(bpm） (60-100)	WBC(x109/L) (3.5-9.5)	RBC(x1012/L) (4.4-6.0)	HCT(%) (49-57)	Hb(g/L) (144-175)	CRP(mg/L) (0-10)
P1	male	21	Han	No	plane	No	No	3658	118	70	84	12.6	5.3	45	161	67.1
P3	male	22	Han	No	unknown	No	No	3658	116	72	90	10.9	4.9	46	156	70.8
P4	male	23	Han	No	plane	No	No	3658	106	96	130	14.6	5.4	44	134	28.1
P5	male	24	Han	No	plane	No	No	3658	122	84	118	11.3	5	46	160	117.4
P6	male	24	Han	No	plane	No	No	3658	113	76	121	7.6	5	44	154	15.2
P8	male	27	Han	No	unknown	No	No	3658	134	101	89	5.3	5.3	49	160	10.1
P9	male	27	Han	No	plane	No	No	3658	106	68	118	6.5	4.9	43	150	83.5
P10	male	30	Han	No	plane	No	No	3658	130	78	86	17.6	4.8	33	98	29
P11	male	31	Han	No	train	No	No	3658	112	68	102	7.6	4.7	42	147	64
P13	male	21	Han	No	plane	No	No	3658	125	88	145	12.8	6.1	54	183	31.7
P14	male	22	Han	No	plane	No	No	3658	109	78	135	12.2	5.5	51	171	43.4
P16	male	34	Han	No	train	No	No	3658	122	86	88	6.5	4.9	46	151	22
P17	male	25	Han	No	plane	No	No	3658	174	116	126	8	5.3	47	157	84.4
P18	male	27	Han	No	plane	No	No	3658	164	116	97	7.1	4.5	41	139	166.3
P19	male	23	Han	No	plane	No	No	3658	125	78	91	7.7	4.9	48	142	16.6
P20	male	35	Han	No	unknown	No	No	3658	158	103	98	8.3	4.9	44	153	60
P21	male	21	Han	No	train	No	No	3658	120	70	108	10.7	4.8	45	148	14.3
P22	male	21	Han	No	plane	No	No	3658	118	73	126	10.3	7	58	194	52.8
P23	male	25	Han	No	plane	No	No	3658	118	74	126	13.3	5.8	50	170	23.1
P25	male	26	Han	No	plane	No	No	3658	140	102	129	20.1	6	51	176	31.9
P26	male	33	Han	No	plane	No	No	3658	138	99	114	13.6	5.7	53	161	105.1
P27	male	34	Han	No	train	No	No	3658	120	86	112	11.7	5.1	46	149	72.1
P28	male	35	Han	No	plane	No	No	3658	127	87	116	12.7	5.6	49	165	13.6
P29	male	44	Han	No	plane	No	No	3658	112	90	112	8.7	4.8	46	144	45.5
P30	male	48	Han	No	plane	No	No	3658	139	92	121	16.2	6.1	52	183	57
P31	male	26	Han	No	plane	No	No	3658	124	82	102	6.4	4.9	47	172	17.4
P32	male	21	Han	No	plane	No	No	3658	120	65	84	13.5	5.4	48	175	73.1
P33	male	30	Han	No	plane	No	No	3658	140	83	98	16.3	5.6	51	159	11.4
P34	male	23	Han	No	train	No	No	3658	132	101	112	17.3	5.5	52	157	13.2
P35	male	26	Han	No	plane	No	No	3658	110	60	100	7.4	6.5	45	132	10
P36	male	20	Han	No	plane	No	No	3658	101	66	120	10.4	4.8	56	182	70.2
P37	male	24	Han	No	train	No	No	3658	122	78	114	12.6	5.8	54	167	19.8
P38	male	38	Han	No	plane	No	No	3658	98	60	120	10.8	5.2	55	137	38.9
P39	male	30	Han	No	plane	No	No	3658	180	123	126	19.7	5.6	48	141	23.4
P40	male	19	Han	No	plane	No	No	3658	99	62	98	7.3	6.4	49	158	58.7
P41	male	24	Han	No	plane	No	No	3658	119	81	98	8.1	5.1	47	150	20.4
P42	male	25	Han	No	plane	No	No	3658	108	77	80	7.2	4.8	43	149	47.8
P43	male	32	Han	No	plane	No	No	3658	112	80	65	16.3	4.9	56	179	46
P44	male	21	Han	No	train	No	No	3658	101	83	63	15.2	5.8	54	177	82.7
P45	male	24	Han	No	plane	No	No	3658	120	90	121	8	7.1	45	167	87.1
P46	male	33	Han	No	plane	No	No	3658	133	88	98	14	5.4	49	161	135.1
P47	male	36	Han	No	car	No	No	3658	141	88	117	10.8	6.2	50	138	47.3
P48	male	25	Han	No	plane	No	No	3658	110	74	141	11	6.1	54	181	26
P49	male	20	Han	No	plane	No	No	3658	109	72	112	11.9	5.1	45	151	52.7
P50	male	22	Han	No	plane	No	No	3658	129	90	109	14.1	5.8	53	171	46.5
P51	male	44	Han	No	plane	No	No	3658	116	79	81	10.7	7.7	54	173	10.4
P52	male	24	Han	No	plane	No	No	3658	110	84	92	14.1	4.7	43	139	31.7
P53	male	30	Han	No	plane	No	No	3658	135	80	116	6	5.7	50	165	114.3
P54	male	30	Han	No	car	No	No	3658	157	88	102	12.2	5.7	53	161	30.8
Abberations: SBP, systolic arterial blood pressure; DBP, diastolic arterial blood pressure; HR, heart rate; WBC, white blood cell; RBC, red blood cell; HCT, hematocrit; Hb, hemoglobin concentration; CRP, C-reactive protein; Red fonts means deletion.

## Sheet: non-HAPE(58)
Basic clinical information of non-HAPE populations.
Patient ID	Gender	Age	Race	Medical History	ascent mode	Smoking	Drinking	Altitude (m)	SBP(mmHg) （<=140）	DBP(mmHg) (<=90)	HR(bpm） (60-100)	WBC(x109/L) (3.5-9.5)	RBC(x1012/L) (4.4-6.0)	HCT(%) (49-57)	Hb(g/L) (144-175)	CRP(mg/L) (0-10)
C1	male	26	Han	No	unknown	No	No	3658	130	90	110	11.2	5.3	46	147	58
C2	male	23	Han	No	plane	No	No	3658	110	68	96	5.5	5.6	49	155	33.2
C3	male	20	Han	No	unknown	No	No	3658	116	50	110	4.4	4.9	50	161	13.6
C4	male	21	Han	No	plane	No	No	3658	124	74	132	7.3	5.2	43	142	14.6
C5	male	20	Han	No	unknown	No	No	3658	118	70	86	22.5	5.8	53	172	14.3
C6	male	19	Han	No	plane	No	No	3658	110	78	126	24.8	6.5	57	196	90.5
C7	male	25	Han	No	unknown	No	No	3658	123	95	90	9	5.7	50	170	23.9
C8	male	52	Han	No	unknown	No	No	3658	119	91	96	4.2	4.8	46	160	11.6
C9	male	55	Han	hand injury	train	No	No	3658	109	67	66	6.4	5.3	52	167	74
C12	male	22	Han	No	plane	No	No	3658	118	70	90	7.2	5.5	51	156	10.9
C13	male	23	Han	No	plane	No	No	3658	111	78	104	10.4	5.4	46	167	67.4
C14	male	22	Han	No	plane	No	No	3658	120	80	90	8.1	5.5	52	171	13.8
C15	male	22	Han	No	plane	No	No	3658	113	82	77	4.7	4.8	47	154	89.4
C16	male	22	Han	No	train	No	No	3658	94	55	100	5.5	6.3	55	173	10.2
C17	male	22	Han	No	train	No	No	3658	138	94	124	9.2	5.1	48	155	57
C18	male	23	Han	No	plane	No	No	3658	110	76	80	6.8	4.9	50	164	100.2
C19	male	24	Han	No	train	No	No	3658	99	77	96	5.3	5.6	49	155	13.5
C20	male	22	Han	No	plane	No	No	3658	118	85	111	17.4	4.7	47	166	8.2
C21	male	23	Han	No	plane	No	No	3658	108	93	86	3.9	5.8	44	174	74
C22	male	22	Han	No	plane	No	No	3658	132	78	100	6.4	4.6	44	174	109.1
C23	male	22	Han	No	plane	No	No	3658	135	90	97	9.5	5.9	56	172	11.3
C24	male	22	Han	No	plane	No	No	3658	123	80	75	4.9	5.2	48	162	8.9
C25	male	22	Han	No	plane	No	No	3658	114	79	85	7.6	5.3	58	172	8.9
C26	male	23	Han	No	plane	No	No	3658	102	91	95	9.7	6.5	56	163	9.88
C27	male	24	Han	No	plane	No	No	3658	125	89	104	7.2	5.7	51	183	37.5
C28	male	25	Han	No	plane	No	No	3658	126	97	74	7.4	5.1	57	181	111.6
C29	male	24	Han	No	plane	No	No	3658	133	74	110	5.7	5.7	46	154	24.6
C30	male	36	Han	No	plane	No	No	3658	120	93	90	10.3	5.2	44	180	63.8
C31	male	26	Han	No	plane	No	No	3658	105	85	99	4.7	5.9	58	183	46.96
C32	male	27	Han	No	plane	No	No	3658	130	67	94	6.9	5.8	54	183	35.9
C33	male	26	Han	No	plane	No	No	3658	129	83	84	4.7	5.6	51	173	127.6
C34	male	24	Han	No	plane	No	No	3658	110	94	73	12.5	4.9	46	178	10.1
C35	male	24	Han	No	plane	No	No	3658	128	94	72	8.3	5.4	45	167	9.7
C36	male	25	Han	No	plane	No	No	3658	115	86	98	10.6	5.5	49	161	24.3
C37	male	25	Han	No	plane	No	No	3658	127	73	88	7.5	5	47	160	44.6
C38	male	27	Han	No	plane	No	No	3658	109	70	75	9.3	4.7	58	179	8.4
C39	male	25	Han	No	plane	No	No	3658	100	76	77	6.6	6.4	53	180	47
C40	male	26	Han	No	plane	No	No	3658	103	96	82	9.4	4.6	48	167	8.7
C41	male	26	Han	No	plane	No	No	3658	137	75	92	6.5	4.8	50	178	10.4
C42	male	24	Han	No	plane	No	No	3658	136	88	77	7.4	4.5	50	164	15.3
C43	male	24	Han	No	plane	No	No	3658	113	81	83	5.8	5.6	51	172	80.9
C44	male	27	Han	No	plane	No	No	3658	132	84	71	8.4	6.2	54	164	8.2
C45	male	26	Han	No	plane	No	No	3658	108	83	102	7.8	4.9	53	159	11.2
C46	male	27	Han	No	train	No	No	3658	131	75	79	4.9	5.9	43	177	9.6
C47	male	26	Han	No	plane	No	No	3658	99	69	112	9.3	5.4	58	169	8.3
C48	male	26	Han	No	plane	No	No	3658	112	87	80	8.5	6.1	46	154	76
C49	male	25	Han	No	plane	No	No	3658	107	96	89	10	5	53	171	108.3
C50	male	25	Han	No	plane	No	No	3658	121	73	101	6.7	5.8	57	181	10.9
C51	male	27	Han	No	plane	No	No	3658	134	66	78	14.7	5.5	53	163	8.7
C52	male	26	Han	No	plane	No	No	3658	117	83	107	7.8	6.3	58	172	9.3
C53	male	25	Han	No	plane	No	No	3658	119	92	72	4.7	5.1	51	179	10.4
C54	male	26	Han	No	train	No	No	3658	111	72	83	8.4	5.7	49	161	35.8
C55	male	26	Han	No	plane	No	No	3658	137	95	91	7.7	5.2	51	175	110.4
C56	male	26	Han	No	plane	No	No	3658	130	71	109	7.3	4.8	53	176	26.4
C57	male	24	Han	No	plane	No	No	3658	131	68	81	9.2	5.3	44	184	9.8
C58	male	24	Han	No	plane	No	No	3658	133	77	103	8.3	5.1	48	169	63.3
C59	male	25	Han	No	train	No	No	3658	104	83	82	6.5	4.8	48	161	10.7
C60	male	26	Han	No	train	No	No	3658	114	86	78	7.1	5.5	48	156	9.4
Abberations: SBP, systolic arterial blood pressure; DBP, diastolic arterial blood pressure; HR, heart rate; WBC, white blood cell; RBC, red blood cell; HCT, hematocrit; Hb, hemoglobin concentration; CRP, C-reactive protein; Red fonts means deletion.

## Sheet: HAPE-validation(132)
Basic clinical information of HAPE patients.
Patient ID	Gender	Age	Race	Medical History	ascent mode	Smoking	Drinking	Altitude (m)	SBP(mmHg) （<=140）	DBP(mmHg) (<=90)	HR(bpm） (60-100)	WBC(x109/L) (3.5-9.5)	RBC(x1012/L) (4.4-6.0)	HCT(%) (49-57)	Hb(g/L) (144-175)	CRP(mg/L) (0-10)
PV-1	male	23	Han	No	plane	No	No	3658	119	99	83	16.2	5.3	57	140	101.8
PV-2	male	57	Han	No	plane	No	No	3658	104	69	114	10.4	5.1	51	165	18.4
PV-3	male	25	Han	No	plane	No	No	3658	109	69	137	5.7	4.8	48	148	60.7
PV-4	male	21	Han	No	plane	No	No	3658	90	60	94	14.6	4.8	52	144	87.8
PV-5	male	57	Han	No	plane	No	No	3658	140	86	122	6.8	4.9	44	161	108.2
PV-6	male	46	Han	No	car	No	No	3658	100	74	140	8.3	5.4	44	160	50.4
PV-7	male	20	Han	No	plane	No	No	3658	128	78	130	23.3	4.7	51	150	23.4
PV-8	male	32	Han	No	plane	No	No	3658	160	90	106	13.3	4.8	50	155	49.7
PV-9	male	21	Han	No	unknown	No	No	3658	120	86	102	5.8	5	52	165	157.1
PV-10	male	23	Han	No	plane	No	No	3658	126	90	101	12.6	4.9	45	150	58.1
PV-11	male	25	Han	No	plane	No	No	3658	136	98	107	11.3	5.2	52	162	33.7
PV-12	male	25	Han	No	unknown	No	No	3658	124	74	132	8.3	4.8	45	147	19
PV-13	male	31	Han	No	plane	No	No	3658	114	95	116	17.6	5.2	51	175	146.2
PV-14	male	49	Han	No	plane	No	No	3658	120	73	77	11.3	4.8	50	147	25.9
PV-15	male	59	Han	No	train	No	No	3658	130	80	106	12.2	5.2	53	166	113.4
PV-16	male	24	Han	No	plane	No	No	3658	110	70	90	6.5	4.7	46	154	33.9
PV-17	male	24	Han	No	plane	No	No	3658	100	70	80	9.5	5.8	45	166	43.2
PV-18	male	44	Han	No	unknown	No	No	3658	136	85	114	6.4	5.1	51	133	16.3
PV-19	male	48	Han	No	car	No	No	3658	142	81	113	10.2	5.1	49	164	30.1
PV-20	male	21	Han	No	train	No	No	3658	107	59	90	6.4	5.2	53	165	45.2
PV-21	male	28	Han	nasosinusitis	plane	No	No	3658	127	92	105	7.4	5.1	45	107	32.6
PV-22	male	44	Han	fracture of nasal bone	car	No	No	3658	110	82	88	6.5	5.8	51	174	37.8
PV-23	male	47	Han	No	train	No	No	3658	127	70	101	11.7	5.2	49	173	23.8
PV-24	male	48	Han	No	unknown	No	No	3658	143	102	97	7.6	5.9	49	153	33.7
PV-25	male	39	Han	No	plane	No	No	3658	102	87	95	16.6	5.8	52	169	17.3
PV-26	male	28	Han	lockjaw	unknown	No	No	3658	110	98	97	5.7	5.8	51	161	55.4
PV-27	male	19	Han	No	plane	No	No	3658	136	98	107	13.6	5.2	48	174	104.3
PV-28	male	33	Han	No	plane	No	No	3658	96	62	102	6.3	5	50	147	50.5
PV-29	male	35	Han	No	car	No	No	3658	105	75	103	12.6	5.8	51	151	78.4
PV-30	male	35	Han	No	plane	No	No	3658	108	80	100	14.1	5.1	52	144	29.9
PV-31	male	37	Han	No	car	No	No	3658	100	70	101	25.9	6.1	51	156	49.2
PV-32	male	54	Han	No	plane	No	No	3658	119	78	138	10.7	5.1	48	154	23.6
PV-33	male	51	Han	No	train	No	No	3658	139	88	110	8.3	5	46	144	55.6
PV-34	male	39	Han	No	car	No	No	3658	98	70	64	15.9	5.2	52	162	49
PV-35	male	28	Han	No	train	No	No	3658	110	69	122	8.7	5.1	44	149	34.8
PV-36	male	51	Han	No	train	No	No	3658	155	104	102	11	5.1	50	158	100.2
PV-37	male	27	Han	No	plane	No	No	3658	102	80	98	6.3	5.1	46	144	88.6
PV-38	male	59	Han	No	plane	No	No	3658	110	90	98	5.3	5	46	159	12.5
PV-39	male	59	Han	No	plane	No	No	3658	120	94	116	10.3	5	47	172	42.6
PV-40	male	36	Han	No	plane	No	No	3658	140	100	110	17.3	6.3	47	117	70.5
PV-41	male	46	Han	No	plane	No	No	3658	112	80	90	13.6	5.2	47	157	36.8
PV-42	male	54	Han	No	plane	No	No	3658	144	84	110	10.3	5.8	45	152	46.1
PV-43	male	26	Han	No	plane	No	No	3658	120	75	132	16.3	4.7	52	177	82.9
PV-44	male	23	Han	No	plane	No	No	3658	139	102	102	9.5	5.8	49	154	19.6
PV-45	male	25	Han	No	plane	No	No	3658	120	87	110	9.1	5.2	45	147	42.7
PV-46	male	29	Han	hyperthyroidism	unknown	No	No	3658	111	74	102	5.7	5.9	49	164	107.4
PV-47	male	49	Han	prostatitis	plane	No	No	3658	110	73	126	12.3	5.2	51	168	30.2
PV-48	male	45	Han	No	plane	No	No	3658	120	70	105	6.5	5.2	50	166	27.1
PV-49	male	31	Han	No	plane	No	No	3658	107	76	90	6.2	5.8	45	159	29.9
PV-50	male	25	Han	No	plane	No	No	3658	125	92	109	7.7	6.1	52	165	84.2
PV-51	male	29	Han	No	plane	No	No	3658	131	84	95	9.5	5.8	47	190	17.8
PV-52	male	43	Han	No	plane	No	No	3658	92	60	106	16.7	6	44	170	122
PV-53	male	35	Han	appendicitis excision	unknown	No	No	3658	120	70	98	6.5	5.1	47	167	25.8
PV-54	male	30	Han	No	plane	No	No	3658	102	70	98	14.6	5.1	52	155	39.2
PV-55	male	20	Han	No	plane	No	No	3658	102	62	118	10.4	6.5	52	172	27.2
PV-56	male	27	Han	No	plane	No	No	3658	106	84	76	20.1	5.2	50	161	103.5
PV-57	male	28	Han	lockjaw	plane	No	No	3658	120	80	98	6.7	6.1	53	163	13.6
PV-58	male	30	Han	No	plane	No	No	3658	124	85	93	9.7	5.1	49	180	6.5
PV-59	male	37	Han	No	unknown	No	No	3658	96	62	102	10.5	6	47	164	34
PV-60	male	37	Han	No	plane	No	No	3658	135	101	98	6.5	5.1	45	171	36.1
PV-61	male	24	Han	No	plane	No	No	3658	119	89	124	12.8	4.7	47	146	44
PV-62	male	22	Han	No	plane	No	No	3658	118	70	112	10.5	5.8	46	145	20
PV-63	male	25	Han	No	plane	No	No	3658	106	84	119	10.9	5.8	49	152	56.2
PV-64	male	35	Han	No	plane	No	No	3658	102	80	119	6.5	5.9	51	144	42
PV-65	male	48	Han	No	plane	No	No	3658	173	115	131	5.7	6	50	145	75.3
PV-66	male	51	Han	No	plane	No	No	3658	121	68	102	10.3	6.1	53	154	84
PV-67	male	24	Han	No	plane	No	No	3658	127	94	134	5.8	5.9	49	161	44.9
PV-68	male	18	Han	No	plane	No	No	3658	128	96	122	11.1	5.2	44	163	85.7
PV-69	male	43	Han	left tibial fracture	plane	No	No	3658	120	83	122	11.1	6.1	46	158	57.9
PV-70	male	47	Han	No	plane	No	No	3658	108	72	108	6.2	6	48	154	28.7
PV-71	male	22	Han	No	car	No	No	3658	104	76	107	9.6	5.8	44	150	32.7
PV-72	male	24	Han	No	plane	No	No	3658	119	86	102	11.2	5.1	45	174	46.1
PV-73	male	18	Han	No	car	No	No	3658	122	90	98	7.6	4.5	44	146	47.5
PV-74	male	24	Han	Kidney stone	plane	No	No	3658	118	89	108	7.1	6.1	50	148	79
PV-75	male	37	Han	No	train	No	No	3658	130	92	123	10.8	4.7	47	127	49
PV-76	male	25	Han	No	plane	No	No	3658	110	72	96	11.2	5.1	44	172	7.6
PV-77	male	31	Han	No	train	No	No	3658	110	76	112	11.3	5.9	52	153	27.9
PV-78	male	47	Han	No	plane	No	No	3658	124	74	132	6.2	5.2	46	160	40
PV-79	male	23	Han	No	plane	No	No	3658	114	95	116	14.1	5.1	45	166	32.4
PV-80	male	21	Han	No	train	No	No	3658	105	74	84	12.6	5.8	50	180	25.6
PV-81	male	38	Han	No	plane	No	No	3658	108	68	135	8.8	5.9	49	178	96.3
PV-82	male	21	Han	No	plane	No	No	3658	158	92	132	9.2	5	49	190	25.4
PV-83	male	23	Han	No	plane	No	No	3658	106	78	80	13.4	5.2	53	165	86.7
PV-84	male	24	Han	No	plane	No	No	3658	180	80	141	10.9	6.1	48	175	41.1
PV-85	male	27	Han	No	plane	No	No	3658	108	77	121	6.3	5.1	46	163	23.9
PV-86	male	31	Han	No	plane	No	No	3658	112	80	116	12.1	5.8	48	172	20
PV-87	male	22	Han	No	plane	No	No	3658	112	90	92	11.6	4.6	53	168	57
PV-88	male	25	Han	No	car	No	No	3658	139	65	98	11.3	4.7	53	174	11.4
PV-89	male	23	Han	No	car	No	No	3658	97	84	63	7.2	5.1	51	174	8.4
PV-90	male	21	Han	No	plane	No	No	3658	134	96	97	7.8	5.1	46	147	16.8
PV-91	male	25	Han	No	plane	No	No	3658	122	68	123	10.3	5.2	49	148	40
PV-92	male	33	Han	No	plane	No	No	3658	127	102	112	8	5.1	52	174	93.5
PV-93	male	35	Han	No	plane	No	No	3658	120	73	107	11.3	5.8	50	151	46.7
PV-94	male	48	Han	No	unknown	No	No	3658	125	116	102	11.2	5.1	51	155	118.3
PV-95	male	21	Han	No	plane	No	No	3658	164	86	121	6.3	5.1	49	188	8.9
PV-96	male	23	Han	No	plane	No	No	3658	117	83	108	11.1	5.9	50	144	48.1
PV-97	male	20	Han	No	train	No	No	3658	111	101	98	9.3	5.9	44	177	14.6
PV-98	male	38	Han	No	plane	No	No	3658	122	103	102	12.3	5.2	45	196	37.8
PV-99	male	19	Han	No	plane	No	No	3658	127	78	118	14.6	5	52	175	69
PV-100	male	25	Han	prostatitis	plane	No	No	3658	109	81	108	12.7	6	46	184	91
PV-101	male	21	Han	No	plane	No	No	3658	181	116	126	8	5	51	153	65.3
PV-102	male	33	Han	No	plane	No	No	3658	133	60	126	13.5	5.8	49	174	114.7
PV-103	male	25	Han	No	plane	No	No	3658	174	84	98	6.3	6	52	105	67.8
PV-104	male	22	Han	No	plane	No	No	3658	179	88	65	11.7	5.9	50	155	25.8
PV-105	male	24	Han	No	plane	No	No	3658	129	82	102	11.2	5.8	47	159	62.9
PV-106	male	22	Han	No	car	No	No	3658	109	70	84	7.6	5.8	53	145	83.3
PV-107	male	24	Han	No	plane	No	No	3658	104	88	120	6.3	5.2	53	147	96.9
PV-108	male	27	Han	No	plane	No	No	3658	130	101	86	6.4	5.2	45	170	117.7
PV-109	male	30	Han	No	plane	No	No	3658	120	70	91	11	5.8	49	163	15.8
PV-110	male	21	Han	No	plane	No	No	3658	135	90	116	8.6	5.8	45	156	53.2
PV-111	male	34	Han	No	plane	No	No	3658	101	62	129	13.6	5.1	44	154	81.8
PV-112	male	27	Han	No	plane	No	No	3658	98	83	126	9.6	5.2	51	162	9.5
PV-113	male	35	Han	No	plane	No	No	3658	140	79	109	13.3	6.1	50	145	31.2
PV-114	male	21	Han	No	plane	No	No	3658	124	74	100	5.5	5.5	44	175	91.5
PV-115	male	26	Han	No	plane	No	No	3658	101	87	98	5.3	5	49	159	13.3
PV-116	male	34	Han	No	train	No	No	3658	123	90	126	6	5.2	44	161	119.3
PV-117	male	44	Han	No	plane	No	No	3658	120	72	112	4.3	6.1	50	149	93.6
PV-118	male	26	Han	No	plane	No	No	3658	110	99	88	6.4	5	51	114	25.3
PV-119	male	30	Han	No	plane	No	No	3658	113	123	89	7.3	5.9	53	140	11.3
PV-120	male	26	Han	No	plane	No	No	3658	140	66	98	10.4	5.9	47	174	90.1
PV-121	male	24	Han	No	plane	No	No	3658	139	72	96	8.2	5.8	52	157	117.8
PV-122	male	30	Han	No	train	No	No	3658	132	78	114	11.9	5	47	174	43.9
PV-123	male	24	Han	No	plane	No	No	3658	178	88	98	7.7	4.3	51	144	29.3
PV-124	male	32	Han	No	plane	No	No	3658	119	78	116	13.1	5	47	159	74.5
PV-125	male	24	Han	No	car	No	No	3658	125	88	102	13.9	5.8	49	166	48.8
PV-126	male	36	Han	No	plane	No	No	3658	99	86	81	10.8	5.1	48	170	18.6
PV-127	male	20	Han	No	train	No	No	3658	180	76	118	14.6	5.1	50	147	25.6
PV-128	male	44	Han	lockjaw	plane	No	No	3658	107	60	130	10.3	6.7	47	158	28.4
PV-129	male	30	Han	No	plane	No	No	3658	157	113	90	10.8	5.1	49	155	92.7
PV-130	male	22	Han	No	unknown	No	No	3658	173	84	112	7.3	6	46	171	78.5
PV-131	male	31	Han	No	plane	No	No	3658	116	77	114	6.7	5	51	194	15.8
PV-132	male	35	Han	No	car	No	No	3658	114	102	122	8.6	5.2	47	172	10.4
Abberations: SBP, systolic arterial blood pressure; DBP, diastolic arterial blood pressure; HR, heart rate; WBC, white blood cell; RBC, red blood cell; HCT, hematocrit; Hb, hemoglobin concentration; CRP, C-reactive protein; Red fonts means deletion.

## Sheet: Control-validation(127)
Basic clinical information of non-HAPE patients.
Patient ID	Gender	Age	Race	Medical History	ascent mode	Smoking	Drinking	Altitude (m)	SBP(mmHg) （<=140）	DBP(mmHg) (<=90)	HR(bpm） (60-100)	WBC(x109/L) (3.5-9.5)	RBC(x1012/L) (4.4-6.0)	HCT(%) (49-57)	Hb(g/L) (144-175)	CRP(mg/L) (0-10)
CV-1	male	24	Han	No	plane	No	No	3658	104	79	86	4.7	4.8	59	178	36.8
CV-2	male	33	Han	No	plane	No	No	3658	97	68	87	5.4	6.1	49	168	28.8
CV-3	male	25	Han	No	plane	No	No	3658	120	61	100	8.3	4.7	56	161	82.2
CV-4	male	43	Han	No	plane	No	No	3658	122	54	106	7.4	4.8	47	145	65.6
CV-5	male	27	Han	No	plane	No	No	3658	98	53	128	5.2	5.2	47	153	17.5
CV-6	male	35	Han	No	plane	No	No	3658	136	56	80	5.7	4.7	56	147	3.7
CV-7	male	34	Han	nasosinusitis	plane	No	No	3658	111	97	83	5.5	5.2	48	160	12.2
CV-8	male	30	Han	No	unknown	No	No	3658	135	61	75	12.1	4.6	56	170	74.9
CV-9	male	31	Han	No	plane	No	No	3658	122	53	73	8.1	6.3	48	166	15.5
CV-10	male	30	Han	No	plane	No	No	3658	97	82	109	9.3	6.4	42	185	25
CV-11	male	20	Han	No	plane	No	No	3658	134	87	90	14.3	5.9	45	189	21.7
CV-12	male	29	Han	No	plane	No	No	3658	94	61	101	7.9	6.4	55	165	55.6
CV-13	male	25	Han	No	car	No	No	3658	127	67	88	5.4	4.7	47	179	95.3
CV-14	male	50	Han	No	plane	No	No	3658	103	79	88	5.9	5	51	195	7.4
CV-15	male	45	Han	No	plane	No	No	3658	116	77	99	7.4	5.9	51	175	5.3
CV-16	male	23	Han	No	plane	No	No	3658	129	68	113	7	5.3	63	171	58.9
CV-17	male	37	Han	No	train	No	No	3658	117	96	111	8.6	6	49	149	9.1
CV-18	male	27	Han	No	plane	No	No	3658	124	67	94	5.3	5.2	44	178	30.4
CV-19	male	31	Han	No	plane	No	No	3658	130	90	105	8.3	5.9	49	185	7.4
CV-20	male	29	Han	No	plane	No	No	3658	123	77	107	5.1	5.4	47	185	44
CV-21	male	52	Han	No	plane	No	No	3658	118	65	72	5.6	4.5	52	197	7.1
CV-22	male	34	Han	No	plane	No	No	3658	127	65	96	9.9	5.3	45	171	23.8
CV-23	male	26	Han	No	plane	No	No	3658	128	61	93	7.3	5.9	48	161	8.3
CV-24	male	22	Han	No	plane	No	No	3658	103	72	99	9.3	4.5	57	144	34.6
CV-25	male	40	Han	lockjaw	unknown	No	No	3658	105	68	79	13.9	5	49	161	86.9
CV-26	male	37	Han	No	plane	No	No	3658	119	86	110	9.4	6.4	56	150	58
CV-27	male	25	Han	No	plane	No	No	3658	97	59	90	6.9	5.5	49	175	29.4
CV-28	male	44	Han	No	car	No	No	3658	106	91	71	7.4	5.8	55	167	94.2
CV-29	male	41	Han	No	plane	No	No	3658	119	98	101	9.2	6.1	56	182	51.3
CV-30	male	41	Han	No	train	No	No	3658	133	74	120	9.1	5.4	45	150	19
CV-31	male	54	Han	No	train	No	No	3658	113	85	101	13.7	5.3	54	175	6.9
CV-32	male	38	Han	No	plane	No	No	3658	107	70	73	7.7	5.6	58	173	9.5
CV-33	male	37	Han	No	plane	No	No	3658	133	77	120	8.4	5	54	145	57.1
CV-34	male	41	Han	No	plane	No	No	3658	98	98	73	13	5.7	51	158	31.5
CV-35	male	20	Han	No	plane	No	No	3658	101	77	75	11	5.9	45	177	58.1
CV-36	male	21	Han	No	plane	No	No	3658	129	68	108	9.3	5.8	59	160	89.1
CV-37	male	41	Han	No	plane	No	No	3658	109	92	95	8.1	4.8	43	145	86.5
CV-38	male	39	Han	No	plane	No	No	3658	116	93	100	7.4	5.3	51	160	33.4
CV-39	male	42	Han	No	plane	No	No	3658	131	98	91	7.9	5.7	57	182	67.2
CV-40	male	38	Han	No	plane	No	No	3658	94	71	74	6.2	4.9	57	161	28.1
CV-41	male	34	Han	No	plane	No	No	3658	100	65	68	9.5	5.6	47	187	11.4
CV-42	male	35	Han	No	train	No	No	3658	96	84	87	10.7	6.1	56	192	48.2
CV-43	male	45	Han	No	plane	No	No	3658	97	63	82	8.4	5.3	49	153	56.4
CV-44	male	22	Han	No	plane	No	No	3658	118	62	65	6.7	5.9	55	187	41.6
CV-45	male	52	Han	No	car	No	No	3658	129	79	82	12.4	5	57	144	25.8
CV-46	male	30	Han	No	plane	No	No	3658	97	95	72	4.9	5.3	61	163	14
CV-47	male	20	Han	No	train	No	No	3658	105	73	76	9.2	5.2	48	163	63.9
CV-48	male	38	Han	lockjaw	plane	No	No	3658	107	89	77	11.7	5.8	44	161	101.1
CV-49	male	30	Han	No	plane	No	No	3658	98	69	72	14.2	6.5	49	146	20.4
CV-50	male	30	Han	No	plane	No	No	3658	98	83	116	6	5.4	52	177	5.8
CV-51	male	37	Han	No	plane	No	No	3658	104	62	101	8.9	5.6	54	157	25.1
CV-52	male	24	Han	No	plane	No	No	3658	129	68	71	12.4	5.5	59	149	91.2
CV-53	male	21	Han	No	plane	No	No	3658	133	83	106	7.9	5.9	46	187	36.5
CV-54	male	42	Han	No	plane	No	No	3658	108	59	116	8.4	4.9	47	182	40.7
CV-55	male	44	Han	No	plane	No	No	3658	109	96	87	8.9	5.7	46	155	8.9
CV-56	male	21	Han	No	plane	No	No	3658	104	96	88	7.4	6.1	60	159	39.5
CV-57	male	27	Han	No	plane	No	No	3658	116	91	72	8.4	5.6	52	152	82.3
CV-58	male	40	Han	No	plane	No	No	3658	124	83	114	7.2	5.1	50	152	86.8
CV-59	male	52	Han	No	plane	No	No	3658	104	83	120	7	5.5	54	169	7.5
CV-60	male	33	Han	No	plane	No	No	3658	123	67	70	11.2	4.5	43	193	55
CV-61	male	33	Han	No	plane	No	No	3658	116	63	66	6.5	5.1	49	176	26.8
CV-62	male	52	Han	No	plane	No	No	3658	123	92	129	8.2	5.8	52	164	7.9
CV-63	male	38	Han	No	plane	No	No	3658	110	84	87	4.9	5.4	52	153	9.3
CV-64	male	36	Han	No	plane	No	No	3658	114	93	83	9.3	5.9	47	157	32.3
CV-65	male	20	Han	No	plane	No	No	3658	95	88	91	6.7	4.8	51	152	94.4
CV-66	male	24	Han	lockjaw	plane	No	No	3658	109	66	69	9.8	6.3	48	151	23
CV-67	male	21	Han	No	plane	No	No	3658	103	75	99	10.2	5	52	165	8
CV-68	male	44	Han	No	plane	No	No	3658	111	88	91	6	6	52	144	91.2
CV-69	male	42	Han	No	plane	No	No	3658	138	69	72	6.6	4.7	43	150	88.6
CV-70	male	38	Han	No	plane	No	No	3658	106	75	78	4.7	5.9	56	195	52.6
CV-71	male	29	Han	No	plane	No	No	3658	99	77	80	8.5	5	55	172	8.5
CV-72	male	40	Han	No	plane	No	No	3658	99	68	71	8.8	5.2	49	181	26.2
CV-73	male	38	Han	No	train	No	No	3658	95	98	101	8.3	5.4	54	193	49
CV-74	male	36	Han	No	plane	No	No	3658	136	95	110	11.3	4.5	55	192	47.2
CV-75	male	44	Han	No	plane	No	No	3658	121	73	107	14.3	5.3	53	185	85.3
CV-76	male	54	Han	No	plane	No	No	3658	107	64	67	6.5	4.7	47	182	20.9
CV-77	male	27	Han	No	plane	No	No	3658	100	83	86	6.1	5.3	53	164	8.5
CV-78	male	36	Han	No	plane	No	No	3658	132	98	83	5.9	6.1	45	148	40.8
CV-79	male	24	Han	No	plane	No	No	3658	106	83	86	9.4	4.7	42	177	42.5
CV-80	male	26	Han	No	plane	No	No	3658	122	83	85	9.1	4.9	51	177	10
CV-81	male	43	Han	No	plane	No	No	3658	107	74	77	13.9	5.5	45	163	16
CV-82	male	36	Han	No	plane	No	No	3658	115	96	105	8.8	5.6	50	189	35.9
CV-83	male	25	Han	No	train	No	No	3658	127	59	105	8.2	5.6	58	193	9.8
CV-84	male	33	Han	No	plane	No	No	3658	107	95	98	4.6	6	50	164	41.3
CV-85	male	28	Han	No	plane	No	No	3658	114	89	92	4.7	4.7	47	197	17.7
CV-86	male	35	Han	No	plane	No	No	3658	104	78	81	9.7	5.4	42	162	17.5
CV-87	male	39	Han	No	plane	No	No	3658	120	83	86	5	4.8	42	149	8.7
CV-88	male	23	Han	No	plane	No	No	3658	131	90	70	11.5	6.3	50	164	30
CV-89	male	28	Han	No	plane	No	No	3658	116	76	79	6	5	51	170	67.2
CV-90	male	42	Han	No	plane	No	No	3658	125	82	85	8.2	5.2	56	182	42.1
CV-91	male	24	Han	No	plane	No	No	3658	126	88	102	7.6	4.6	45	192	9.2
CV-92	male	45	Han	No	plane	No	No	3658	110	70	101	5.7	5.8	51	154	61.1
CV-93	male	36	Han	No	plane	No	No	3658	98	73	83	5.3	5.6	46	144	31.1
CV-94	male	37	Han	No	plane	No	No	3658	111	98	94	15.9	4.8	61	146	9.4
CV-95	male	46	Han	No	plane	No	No	3658	114	66	69	7.4	4.8	51	152	95.9
CV-96	male	30	Han	No	plane	No	No	3658	122	81	98	5.1	6.1	43	151	82.8
CV-97	male	21	Han	No	plane	No	No	3658	128	77	127	8.5	4.6	44	142	17.9
CV-98	male	37	Han	No	plane	No	No	3658	96	98	100	13.4	5.5	43	187	8.4
CV-99	male	38	Han	No	plane	No	No	3658	100	72	75	6.8	5.6	44	186	29.1
CV-100	male	34	Han	No	plane	No	No	3658	137	75	117	6.3	6.4	52	143	76.5
CV-101	male	39	Han	No	plane	No	No	3658	108	94	119	8.8	5.2	48	162	82.7
CV-102	male	24	Han	No	plane	No	No	3658	125	64	67	4.5	5.8	54	155	18.4
CV-103	male	42	Han	No	plane	No	No	3658	116	67	111	8.1	5.6	52	187	11.7
CV-104	male	20	Han	No	unknown	No	No	3658	95	95	88	10	4.9	42	170	97
CV-105	male	43	Han	nasosinusitis	plane	No	No	3658	120	94	97	6.5	5	42	189	95.9
CV-106	male	33	Han	No	plane	No	No	3658	136	95	119	7.8	4.6	49	154	56.5
CV-107	male	39	Han	No	plane	No	No	3658	134	59	101	8.2	5.3	49	160	9.9
CV-108	male	36	Han	No	train	No	No	3658	96	59	95	7.1	6.1	55	192	26.6
CV-109	male	41	Han	No	car	No	No	3658	97	70	73	7.3	5.9	48	166	33.8
CV-110	male	42	Han	No	plane	No	No	3658	112	66	69	9.1	6	44	178	95.6
CV-111	male	31	Han	lockjaw	plane	No	No	3658	135	77	88	10.6	5	48	184	32.4
CV-112	male	27	Han	No	plane	No	No	3658	130	93	96	8.5	4.9	51	177	11.7
CV-113	male	27	Han	No	plane	No	No	3658	111	72	75	6.9	4.7	49	144	54.7
CV-114	male	23	Han	No	plane	No	No	3658	97	65	68	11.7	6.2	54	182	91.2
CV-115	male	45	Han	No	plane	No	No	3658	95	90	93	11.9	4.7	53	155	23.2
CV-116	male	23	Han	No	plane	No	No	3658	94	77	100	6.8	5	48	169	90.8
CV-117	male	40	Han	No	plane	No	No	3658	122	94	97	7.9	5.2	55	164	14.2
CV-118	male	36	Han	No	plane	No	No	3658	106	98	130	9.3	4.8	45	177	16.5
CV-119	male	39	Han	No	plane	No	No	3658	96	82	85	7.7	5.3	53	191	78.8
CV-120	male	21	Han	No	plane	No	No	3658	113	59	107	5.3	4.7	53	193	10
CV-121	male	45	Han	No	plane	No	No	3658	101	97	76	5.5	5.5	48	152	11.6
CV-122	male	20	Han	No	plane	No	No	3658	108	92	103	4.7	5.3	52	181	20.8
CV-123	male	20	Han	No	unknown	No	No	3658	131	73	111	4.8	6	54	191	19.4
CV-124	male	39	Han	nasosinusitis	plane	No	No	3658	101	84	131	5.9	5.1	59	189	60.7
CV-125	male	33	Han	No	plane	No	No	3658	121	94	87	4.6	5.9	56	143	6.9
CV-126	male	29	Han	No	plane	No	No	3658	102	87	88	6.9	5.5	54	170	9.7
CV-127	male	38	Han	No	train	No	No	3658	131	59	90	7.9	5.3	51	195	24.8
Abberations: SBP, systolic arterial blood pressure; DBP, diastolic arterial blood pressure; HR, heart rate; WBC, white blood cell; RBC, red blood cell; HCT, hematocrit; Hb, hemoglobin concentration; CRP, C-reactive protein; Red fonts means deletion.
